# Supplementary material for: Exploring Epitaxial Structures for Electrically Pumped Perovskite Lasers: A Study of CsPb(Br,I)3 Based on the Ab Initio Bethe–Salpeter Equation
Source: MDPI journal article supplement (doi:10.3390/ma17020427), 2024-01-15
Supplement: s1 [file s1]

# Supplementary Materials

## “Exploring epitaxial structures for electrically pumped perovskite lasers: a study of $\text{CsPb}(\text{Br},\text{I})_3$ based on the *ab initio* Bethe-Salpeter equation”

Małgorzata Wierzbowska<sup>a,\*</sup> and Juan J. Meléndez<sup>c,d</sup>

<sup>a</sup> Institute of High Pressure Physics, Polish Academy of Sciences

<sup>c</sup> Department of Physics, University of Extremadura.

<sup>d</sup> Institute for Advanced Scientific Computing of Extremadura (ICCAEX).

\* Corresponding author: wierzbowska@unipress.waw.pl.

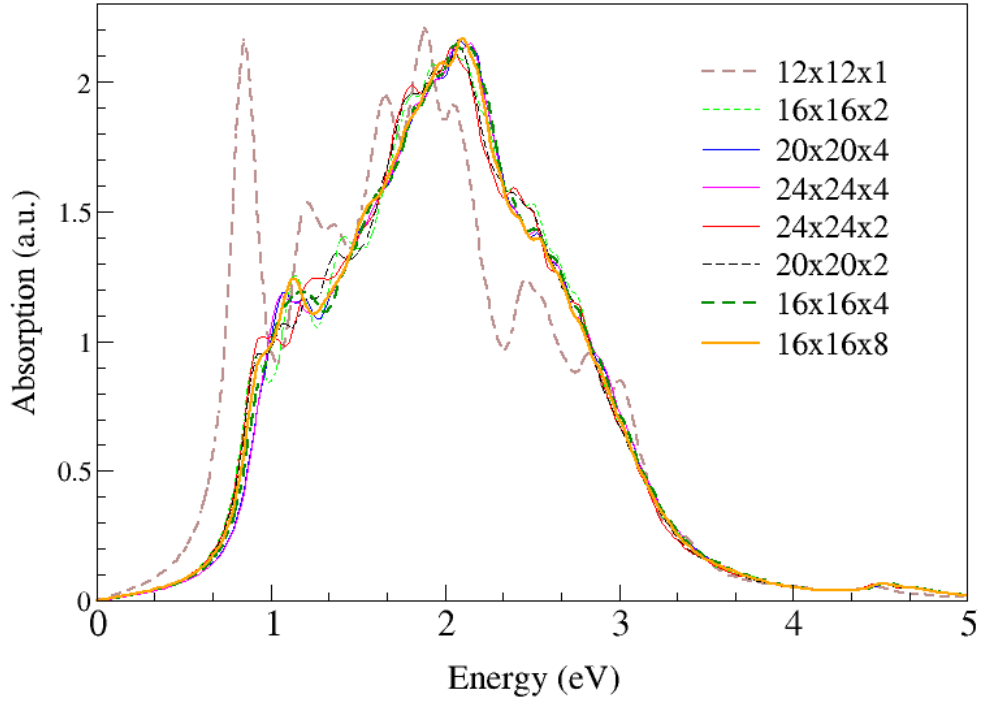

Figure S1: Convergence test for the BSE absorption spectrum for M1 supercell and polarisation [100] performed with respect to the sampling grid in the BZ.

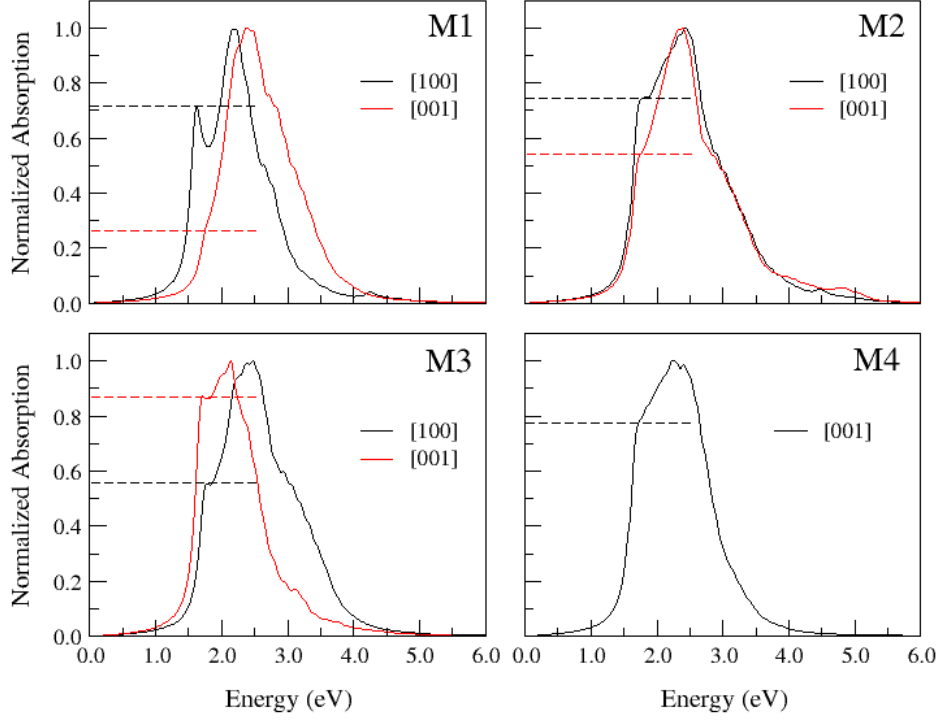

Figure S2: Normalised absorption spectra obtained from the non-relativistic *ab initio* Bethe-Salpeter equation for the supercells considered in this work. In this and the following figure the electric field is chosen either along [100] (in-plane) or along [001] (out-of-plane). The dashed lines indicate the height of the first prominent peaks.

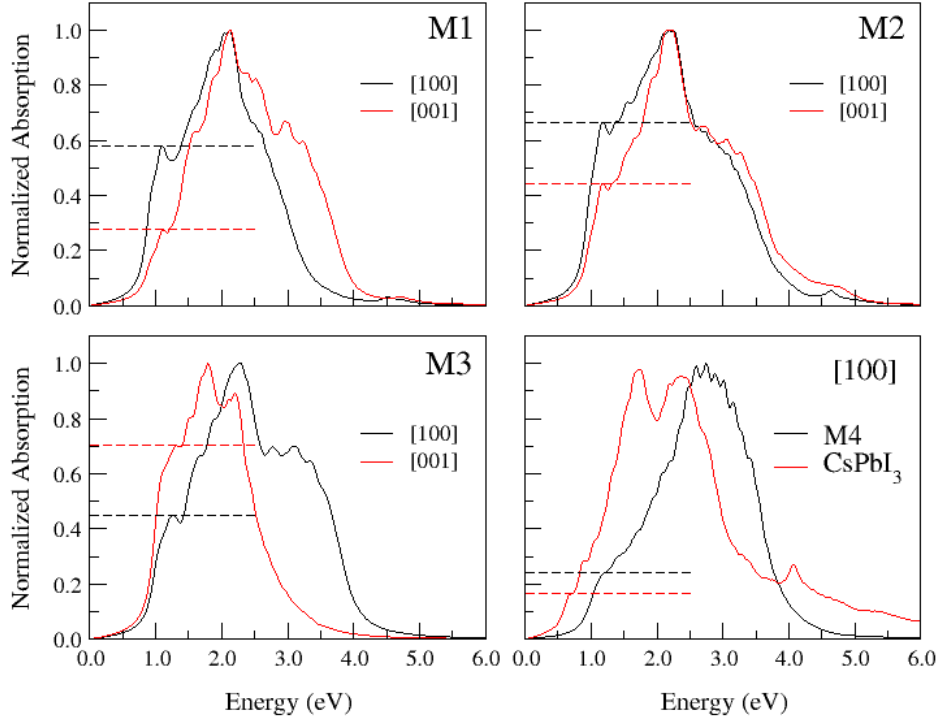

Figure S3: Normalised absorption spectra obtained from the *ab initio* Bethe-Salpeter equation including SOC included for the supercells considered in this work and for pure CsPbI<sub>3</sub>.

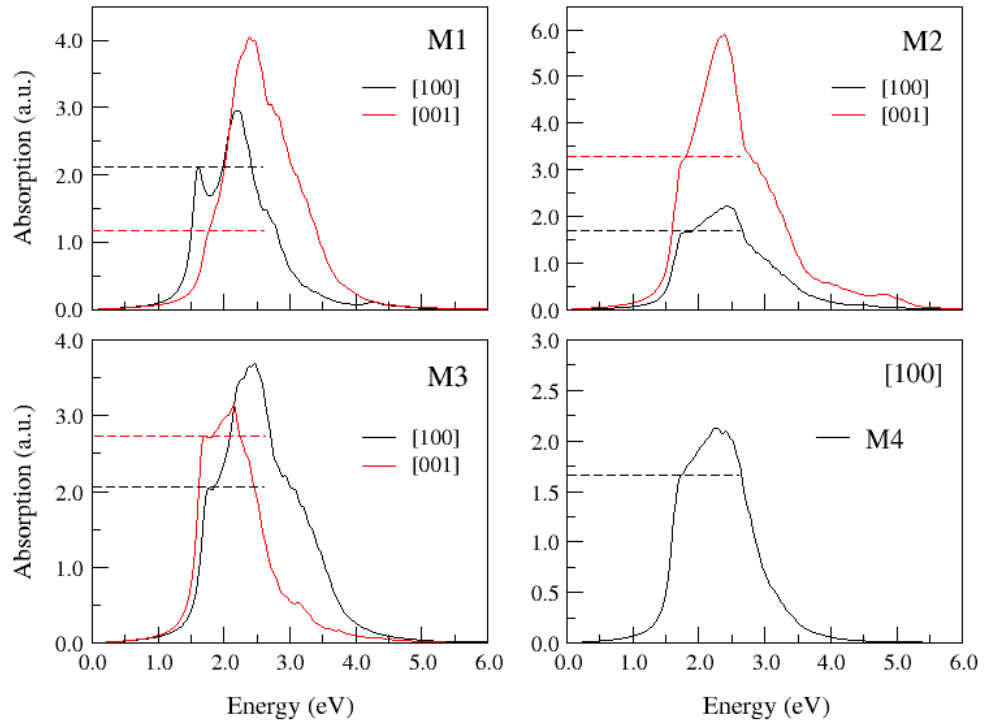

Figure S4: Absorption spectra (not normalised) obtained from the non-relativistic *ab initio* Bethe-Salpeter equation for the supercells considered in this work.
